# Supplementary material
Source: PubMed Central journal article supplement (PMC7275666)
Supplement: pnas.2003742117.sapp.pdf [file pnas.2003742117.sapp.pdf]

## Supporting Information Appendix

**Title: Induction of defense in cereals by 4-fluorophenoxyacetic acid suppresses insect pest populations and increases crop yields in the field**

Wanwan Wang<sup>1, 2</sup>, Pengyong Zhou<sup>1</sup>, Xiaochang Mo<sup>1</sup>, Lingfei Hu<sup>4</sup>, Nuo Jin<sup>1</sup>, Xia Chen<sup>1, 2</sup>, Zhuoxian Yu<sup>1</sup>, Jinpeng Meng<sup>2</sup>, Matthias Erb<sup>4</sup>, Zhicai Shang<sup>2</sup>, Angharad M. R. Gatehouse<sup>3, \*</sup>, Jun Wu<sup>2, \*</sup>, Yonggen Lou<sup>1, \*</sup>

<sup>1</sup>State Key Laboratory of Rice Biology & Ministry of Agriculture Key Lab of Molecular Biology of Crop Pathogens and Insects, Institute of Insect Sciences, Zhejiang University, Hangzhou 310058, China

<sup>2</sup>Department of Chemistry, Zhejiang University, Hangzhou 310058, China

<sup>3</sup>School of Natural and Environmental Sciences, Newcastle University, Newcastle upon Tyne, UK

<sup>4</sup>Institute of Plant Sciences, University of Bern, Bern 3013, Switzerland.

\*To whom correspondence should be addressed. Emails:

[a.m.r.gatehouse@newcastle.ac.uk](mailto:a.m.r.gatehouse@newcastle.ac.uk); [wujunwu@zju.edu.cn](mailto:wujunwu@zju.edu.cn); [yglou@zju.edu.cn](mailto:yglou@zju.edu.cn)

## SI Materials and Methods

**Quantification of 4-FPA and 4-FP in plants.** Plant tissue (about 100 mg) was ground in liquid nitrogen and then 1 mL of 100% methanol was added to each sample. Samples were vortexed for 5 min and centrifuged at 18,000 g for 20 min at 4°C. The supernatants were collected and 4-FPA and 4-FP were analyzed by high performance liquid chromatography (HPLC)-mass spectrometry (MS)-MS as follows: The HPLC separation was performed on an Agilent ZORBAX C<sub>18</sub> column (150 × 2.1 mm, 3.5 μm) at 35°C. The injected volume of sample was 10 μl. The gradient mobile phase consisted of 0.1% acetic acid in water (solvent A) and acetonitrile (solvent B) at a constant flow rate of 0.3 ml min<sup>-1</sup>. A linear gradient profile with the following proportions (v/v) of solvent B was applied: 0 to 5 min, 5% of B; 5 to 10 min, 5% to 55% of B; 10-12 min, 55% to 95% of B. The mass spectrometric analysis was performed using an ESI source in positive ion mode, and the quantification was obtained using multiple reaction monitoring (MRM) mode. The conditions for MS analysis were listed below: capillary voltage of 3500 V, gas temperature of 325°C, gas flow of 5 L min<sup>-1</sup>, nebulizing pressure of 45 psi, sheath gas temperature of 350°C, sheath gas flow of 11 L min<sup>-1</sup> and nozzle voltage of 500 V. The m/z (parent and product) of 4-FPA and 4-FP were 169/111 and 111.1/91, and the CE (V) of 4-FP and 4-FPA were 12 and 25. Standard 4-FPA and 4-FP was purchased from J&K Scientific (Germany) and Shanghai Aladdin biochemical Polytron Technologies Inc. (Shanghai, China), respectively. Each treatment at each time interval was replicated five times.

**Contact and stomach poisoning toxicity of 4-FPA and 4-FP measurement.** For contact toxicity measurements, 40 neonates were placed into a Petri dish (diameter 12 cm, height 2.5 cm) lined with filter paper wetted with 1 ml of 4-FPA (final concentrations ranging from 5 to 50 mg L<sup>-1</sup>); controls were lined with filter paper wetted with 1 ml of distilled water containing the same volume of acetone as in treatments. After 2 h, the nymphs were transferred to rice plants (15 nymphs/plant) contained within a glass cylinder. For stomach poisoning toxicity measurements, 15 × 2<sup>nd</sup> instar nymphs were fed on artificial diet containing 4-FPA at concentrations

ranging from 5 to 50 mg L<sup>-1</sup> or containing 4-FP at a single concentration of 5 mg L<sup>-1</sup> in a 30 ml double-ended open glass cylinder (diameter 2 cm, length 9 cm) as described in Fu et al. (2001); controls were fed on artificial diet without 4-FPA or 4-FP. Ten replicates were carried out per treatment. The number of nymphs surviving on each plant or in each cylinder was recorded daily.

**Preparation of methanol extracts of plants.** The methanol extract of 4-FPA-treated or control plants was prepared as follows: 0.1 g of leaf sheaths of 4-FPA-R plants (5 mg l<sup>-1</sup> 4-FPA, for 4.5 d) or control plants were ground in liquid nitrogen to which was added 1 mL of 80% aqueous ethanol. Samples were vortexed for 5 min, extracted by ultrasound for 20 min and centrifuged at 18,000 g for 20 min at 4°C. Supernatants were collected and concentrated to 50 µL, and then was added into artificial diets at a final concentration of 50 µL mL<sup>-1</sup>.

**Phenolic acid, flavonoid and lignin analysis.** For phenolic acid and flavonoid analysis, samples (100 mg each) were ground in liquid nitrogen and extracted in 1 mL of 80% aqueous ethanol by vortexing for 5 min, followed by ultrasonic treatment for 20 min and finally centrifuged at 18,000 g for 20 min at 4°C. Phenolic acids and flavonoids present in the supernatants were quantified by HPLC-MS-MS as described in (Caristi et al., 2003). Each treatment was replicated five times. Phenolic acid and flavonoid standards were purchased from BioBioPha Biotech Company (Kunming, China). Lignin was extracted and quantified as described by (Xu et al., 2014). Each treatment was replicated five times.

**Polymerization reaction of 4-FP and flavonoids *in vitro*.** To elucidate the potential involvement of 4-FP, flavonoids, H<sub>2</sub>O<sub>2</sub> and PODs in the formation of phenolic polymers, *in vitro* studies were carried out. Two flavonoids, naringenin and quercitrin, which are regulated by 4-FPA in rice, were selected as representative flavonoids for these experiments; both were individually dissolved in 100% methanol to a final concentration of 0.05 mg mL<sup>-1</sup>. 30% H<sub>2</sub>O<sub>2</sub> was diluted to 0.3% in 0.05 mM phosphate buffer solution (PBS) at PH 7.0. 4-FP and POD (Sigma, Aldrich) were dissolved in PBS to final concentrations of 10 mg mL<sup>-1</sup> and 0.34 mg mL<sup>-1</sup>, respectively. The

typical biological reaction system was prepared in a 1.5 mL centrifuge tube as follows: 200  $\mu\text{L}$  of 0.3%  $\text{H}_2\text{O}_2$  + 100  $\mu\text{L}$  of 10  $\text{mg mL}^{-1}$  4-FP + 100  $\mu\text{L}$  of 0.05  $\text{mg mL}^{-1}$  naringenin (or quercitrin), and finally 10  $\mu\text{L}$  of 0.34  $\text{mg mL}^{-1}$  POD was added. To confirm which components in the reaction system are essential for the polymerization reaction, a series of reaction systems were set up (*SI Appendix*, Table S8). After incubation for 12 h at room temperature, samples were centrifuged at 18,000 g for 10 min and the levels of flavonoids and 4-FP in the supernatants quantified using HPLC-MS-MS following the methods for flavonoid or 4-FP analysis as described above. Each reaction was carried out in triplicate.

## References

- Fu, Q., Zhang, Z., Hu, C., Lai, F. & Sun, Z. A chemically defined diet enables continuous rearing of the brown planthopper, *Nilaparvata lugens* (Stål) (Homoptera : Delphacidae). *Appl Entomol Zool* **36**, 111-116, (2001).
- Caristi C, *et al.* (2003) Flavonoids Detection by HPLC-DAD-MS-MS in Lemon Juices from Sicilian Cultivars. *J. Agric. Food Chem* 51:3528-3534.
- Xu Q, *et al.* (2014) Activator- and repressor-type MYB transcription factors are involved in chilling injury induced flesh lignification in loquat via their interactions with the phenylpropanoid pathway. *Journal of Experimental Botany* 65(15):4349-4359.

## SI Figures and Tables

**Fig. S1.** 4-FPA has no direct toxic effect on WBPH nymphs.

**Fig. S2.** Mean root length and plant height (+SE, n=10) of rice plants 10 d after they were grown in nutrient solution containing 0-5 mg L<sup>-1</sup> 4-FPA.

**Fig. S3.** Chromatograms of 4-FPA and 4-FP.

**Fig. S4.** 4-FPA treatment does not affect levels of JA, JA-Ile, SA, or ethylene in rice plants.

**Fig. S5.** Mean levels (+ SE, n = 6) of H<sub>2</sub>O<sub>2</sub> in rice plants at 0.5 and 1 post exposure to NP, 4-FPA, 4-FPA+NP or control (Con).

**Fig. S6.** 4-FPA treatment does not affect levels of phenolic acid and lignin in rice plants.

**Fig. S7.** 4-FP and flavonoids participate in the formation of polymers *in vitro*.

**Fig. S8.** Spraying with 4-FPA sodium salt (SA) causes the deposition of phenolic polymers in rice plants and decreases the survival rate of WBPH nymphs.

**Fig. S9.** Spraying with 4-FPA sodium salt (SA) does not decrease spider numbers.

**Fig. S10.** Mean number of panicles per hill, number of grains per panicle and 1,000 seed weight (+SE, n=3) of plants that were sprayed with different concentrations of 4-FPA in 2015 (upper) and 2016 (below).

**Fig. S11.** Mean number of panicles per hill, number of grains per panicle, seed setting rate, 1,000 seed weight and yield per plant (+SE, n=4) of plants that were sprayed with pymetrozine plus 4-FPA or pymetrozine alone.

**Fig. S12.** 4-FP does not induce rice defences and has no direct harmful effects on WBPH nymphs.

**Fig. S13.** Methanol extracts of 4-FPA-treated rice plants did not influence WBPH nymph performance.

**Fig. S14.** Rice variety does not influence the 4-FPA-induced defenses in rice plants against WBPH nymphs.

**Table S1.** Verification of differently-expressed genes by qRT-PCR

**Table S2.** Differentially-expressed genes related to the auxin-mediated signaling pathway

**Table S3.** Differentially-expressed genes related to hydrogen peroxide generating and scavenging system.

**Table S4.** Differentially-expressed genes related to the phenylpropanoid pathway.

**Table S5.** 4-FPA treatment increases the level of free amino acids in plants

**Table S6.** Management measurements for field experiments in 2015, 2016 and 2019

**Table S7.** Selected genes and their primers used for qRT-PCR

**Table S8.** The composition of reagents or chemicals in different reaction systems

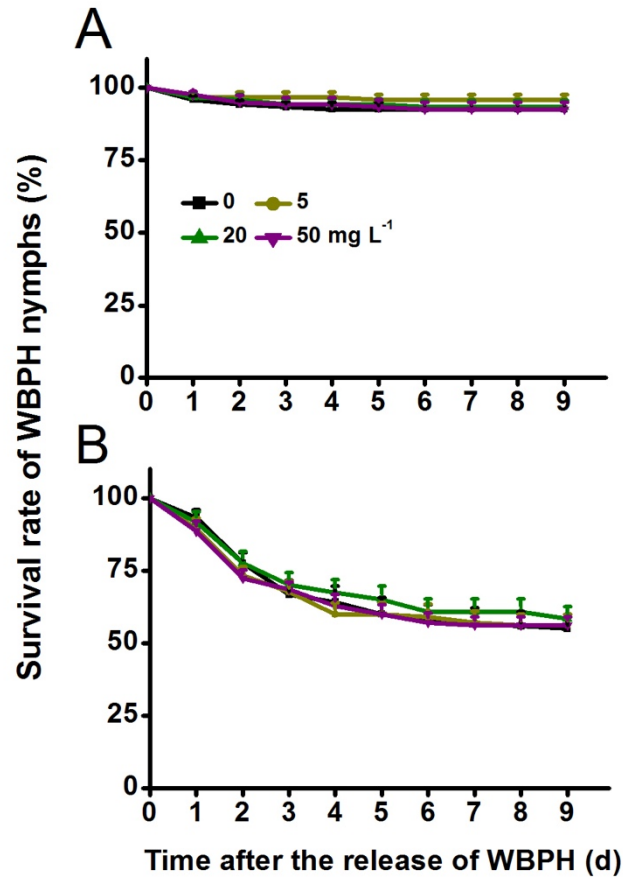

**Fig. S1. 4-FPA has no direct toxic effect on WBPH nymphs.**

(A) Mean survival rate (+SE, n=6) of 2<sup>nd</sup> instar WBPH nymphs following exposure to 5 mg L<sup>-1</sup> 4-FPA for 2 h, 1-9 d after placing on rice plants in contact toxicity studies. (B) Mean survival rate (+SE, n=6) of 2<sup>nd</sup> instar WBPH nymphs fed artificial diet containing 5 mg L<sup>-1</sup> 4-FPA, 1-9 d after exposure. Differences between treatments are not significant.

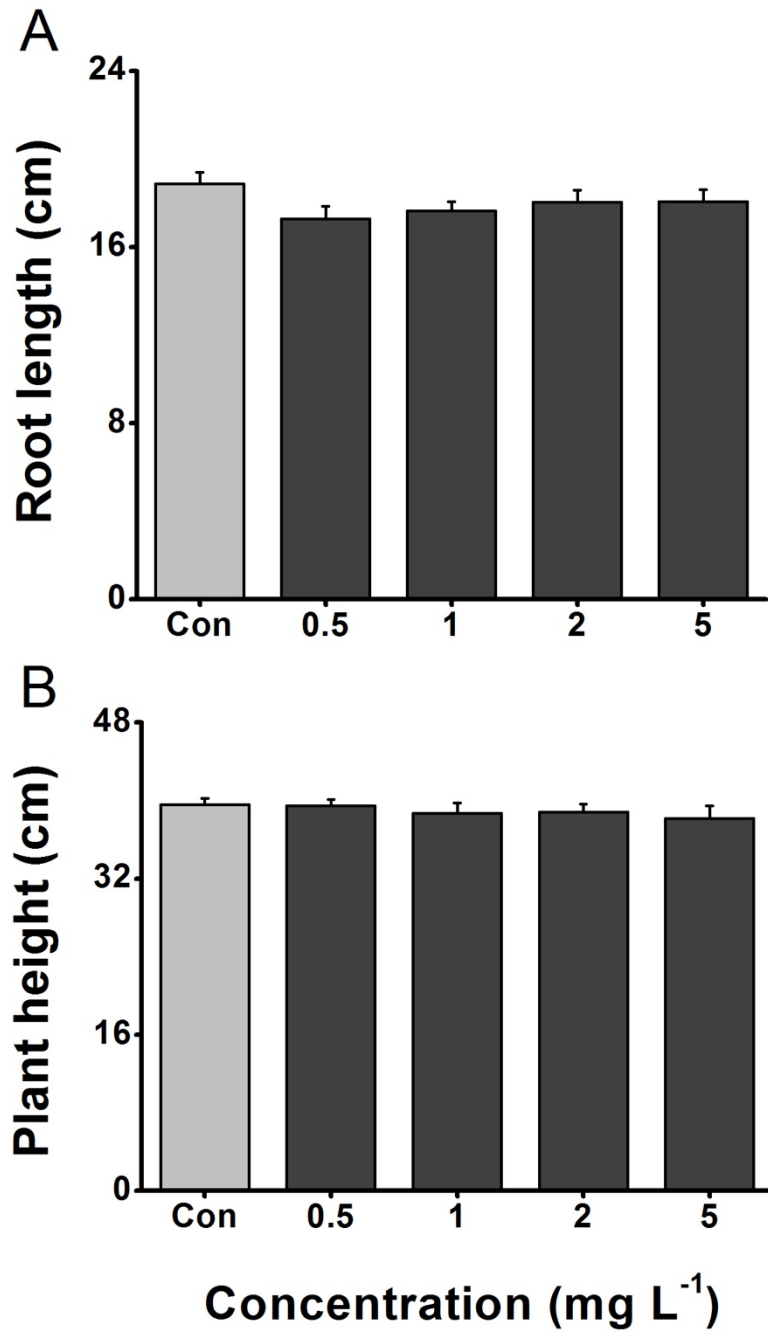

**Fig. S2.** Mean root length and plant height (+SE, n=10) of rice plants 10 d after they were grown in nutrient solution containing 0-5 mg L<sup>-1</sup> 4-FPA. Differences between treatments are not significant.



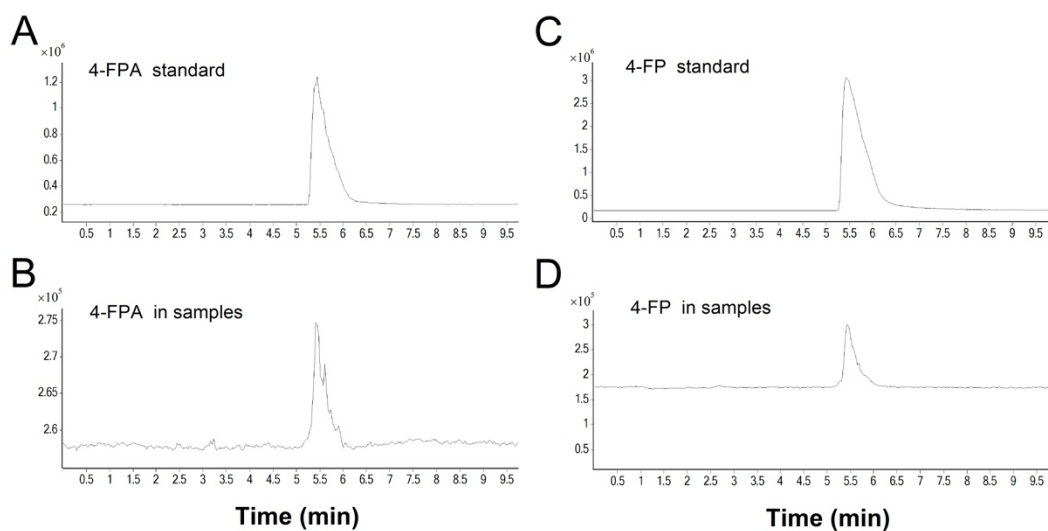

**Fig. S3. Chromatograms of 4-FPA and 4-FP.**

(A, B) Chromatograms of 4-FPA standard (a) and 4-FPA in samples, showing the same retention time. (C, D) Chromatograms of 4-FP standard (c) and 4-FP in samples, showing the same retention time.

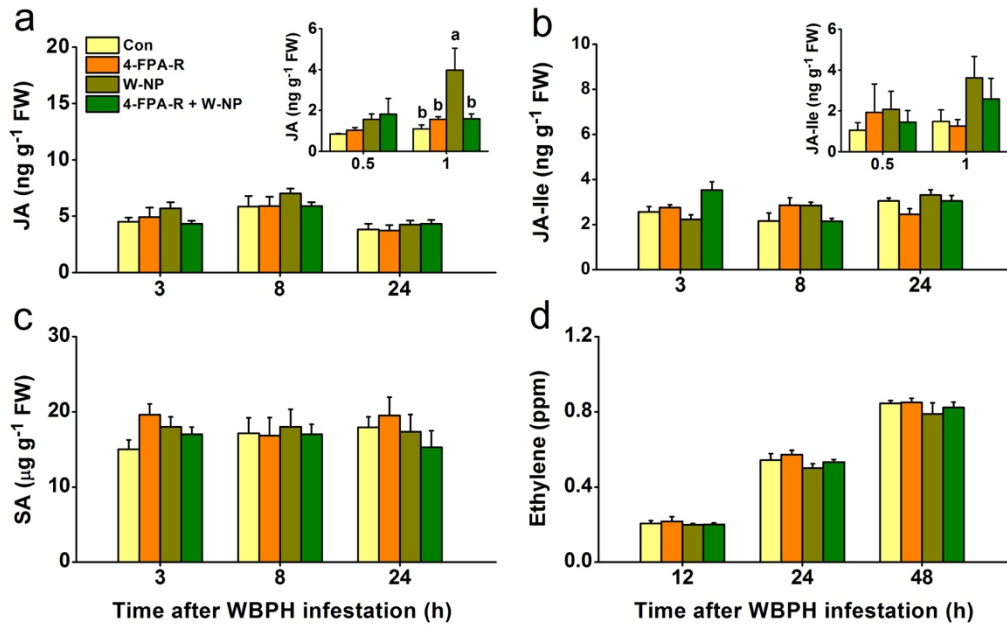

**Fig. S4. 4-FPA treatment does not affect levels of JA, JA-Ile, SA, or ethylene in rice plants.**

(A-C) Mean levels (+ SE,  $n = 6$ ) of JA (A) and JA-Ile (B) in rice plants at 0.5, 1, 3, 8 and 24 h as well as of SA (C) in rice plants at 3, 8 and 24 h post exposure to NP, 4-FPA, 4-FPA+NP or control (Con). (D) Mean levels (+ SE,  $n = 6$ ) of ethylene at 12, 24 and 48 h post exposure to W-NP, 4-FPA, 4-FPA+W-NP or control (Con). Treatment details are described in Materials and Methods. FW, Fresh weight. Letters indicate significant differences among treatments ( $P < 0.05$ ; Duncan's multiple-range test).

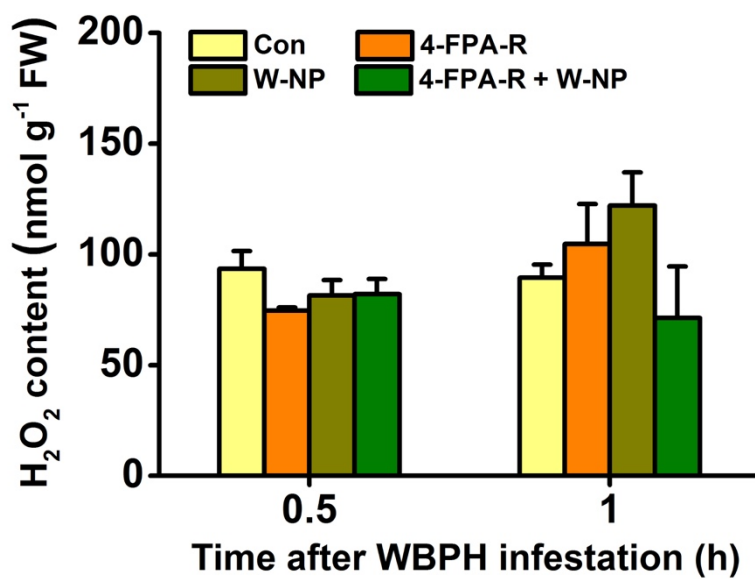

**Fig. S5. Mean levels (+ SE, n = 6) of H<sub>2</sub>O<sub>2</sub> in rice plants at 0.5 and 1 post exposure to NP, 4-FPA, 4-FPA+NP or control (Con).**

Treatment details are described in Materials and Methods. FW, Fresh weight. Differences between treatments are not significant.

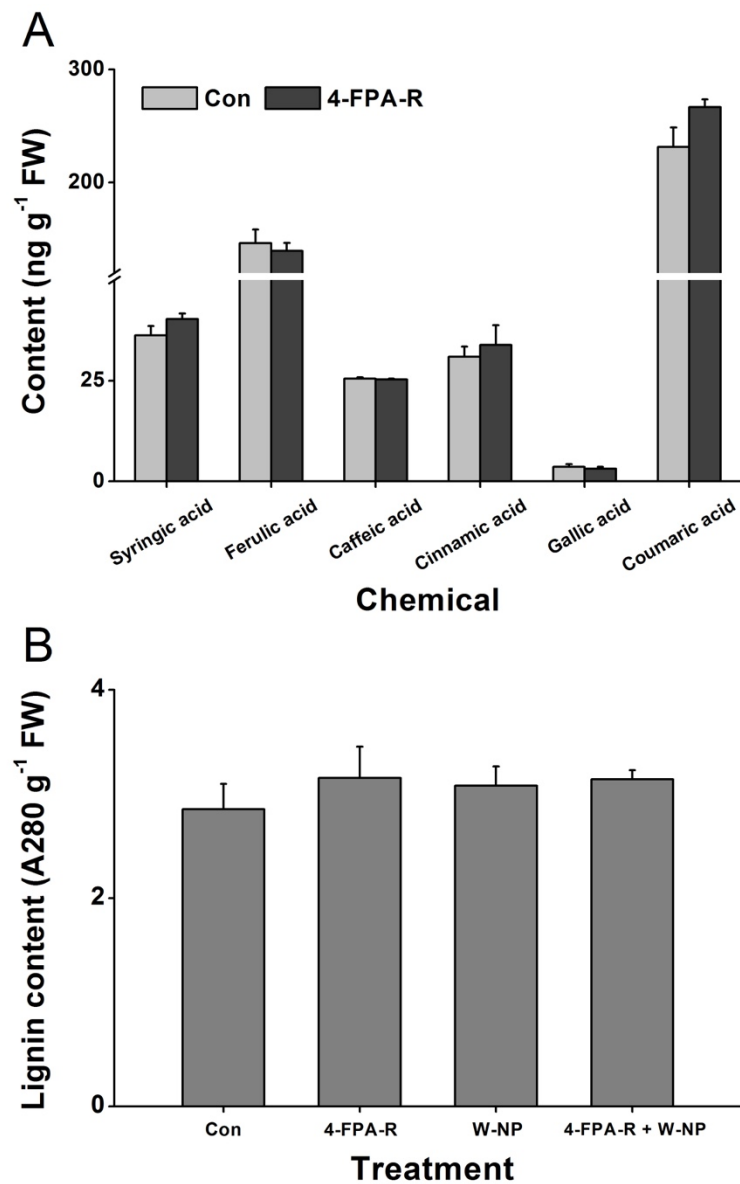

**Fig. S6. 4-FPA treatment does not affect levels of phenolic acid and lignin in rice plants.**

(A, B) Mean levels (+ SE, n = 6) of phenolic acids (A) and lignin (B) in rice plants at 4 d after exposure to W-NP, 4-FPA, 4-FPA+W-NP or control (Con). Treatment details are described in Materials and Methods. FW, Fresh weight. Difference between treatments are not significant.

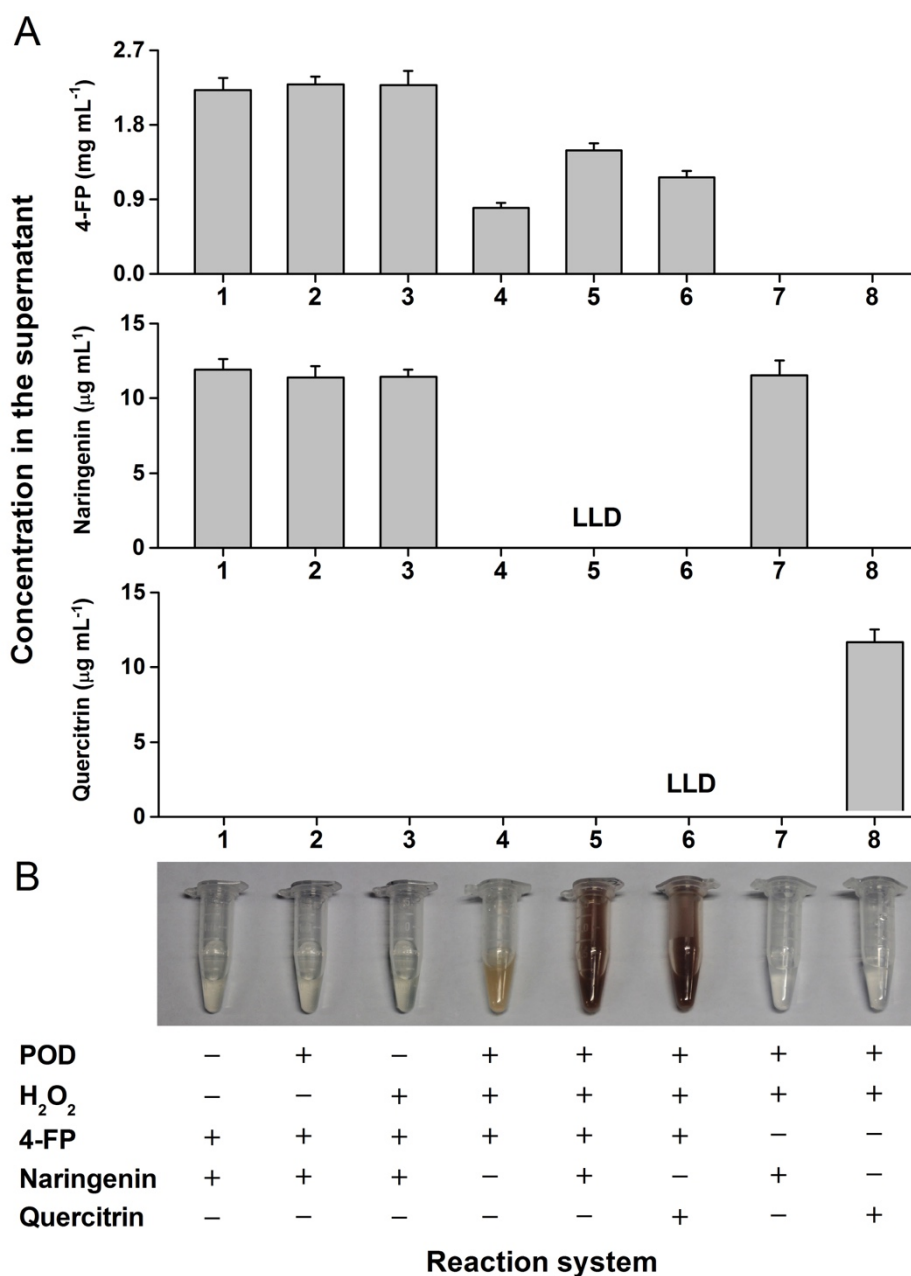

**Fig. S7. 4-FP and flavonoids participate in the formation of polymers *in vitro*.**

(A) Mean levels (+SE, n = 3) of 4-FP, naringenin and quercitrin in the supernatants of different reaction systems (No. 1-8) 24 h post reaction. LLD, lower limit of detection.

(B) Photographs showing the colours of the different reaction systems (No. 1-8) 24 h post reaction. “+” and “-” indicates the presence or absence of the reagent or chemical in the system. No.1-8 indicate different reaction systems.

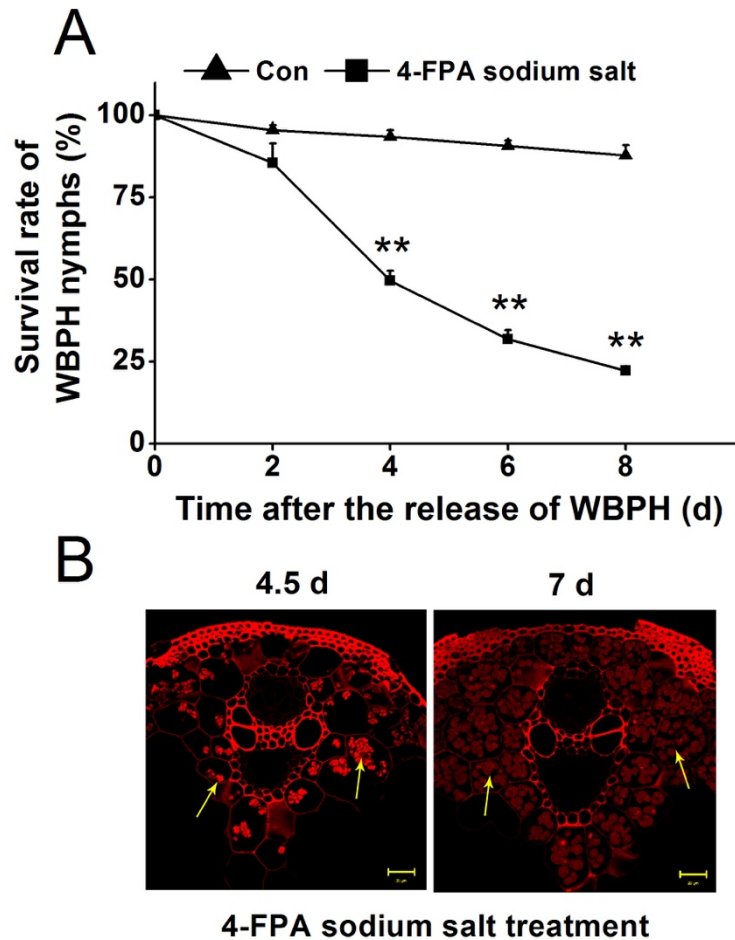

**Fig. S8. Spraying with 4-FPA sodium salt (SA) causes the deposition of phenolic polymers in rice plants and decreases the survival rate of WBPH nymphs.**

(A) Mean survival rate (+SE, n=8) of 15 newly hatched WBPH nymphs on plants that were individually sprayed with 4 ml of 100 mg L<sup>-1</sup> 4-FPA SA, 1-8 d post exposure. (B) Fluorescence image of cross-sections from the leaf sheath of rice plants that were individually sprayed with 4ml of 100 mg L<sup>-1</sup> 4-FPA SA for 4.5 d or 7 d. Scale bars = 20 μm. Asterisks indicate significant differences between treatments and controls (\*\*, P < 0.01; Student's t-tests). Yellow arrows indicate polymer particles.

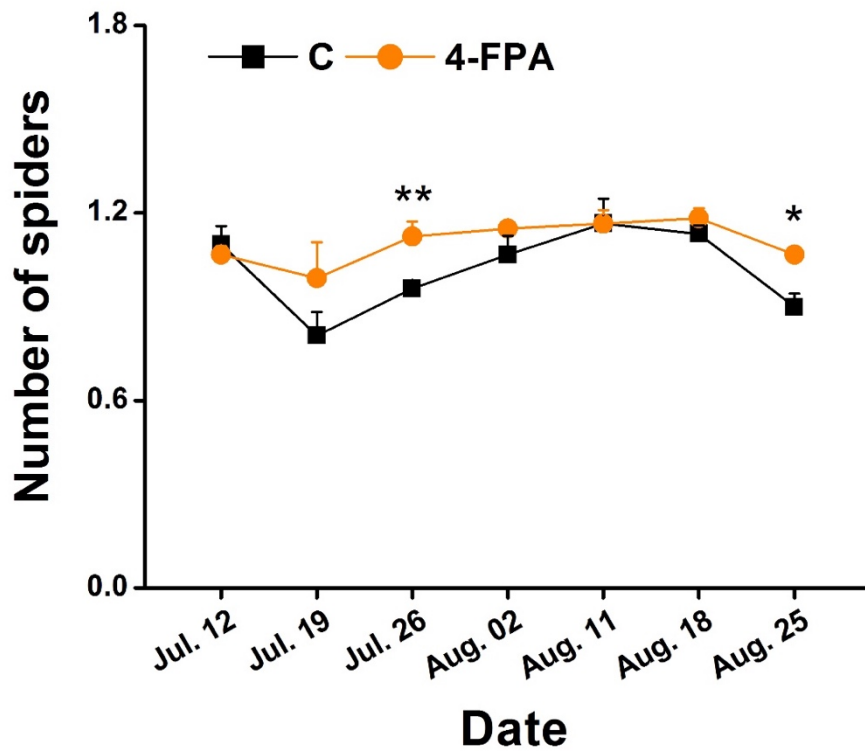

**Fig. S9. Spraying with 4-FPA sodium salt (SA) does not decrease spider numbers.** Mean number (+SE, n=3) of spiders per hill on plants that were sprayed with 200 mg L<sup>-1</sup> 4-FPA SA and control plants in the field. 4-FPA sodium salt was sprayed on July 12<sup>th</sup> 2016. Asterisks indicate significant differences between treatments and controls (\*P < 0.05, \*\*P < 0.01; Student's t-tests).

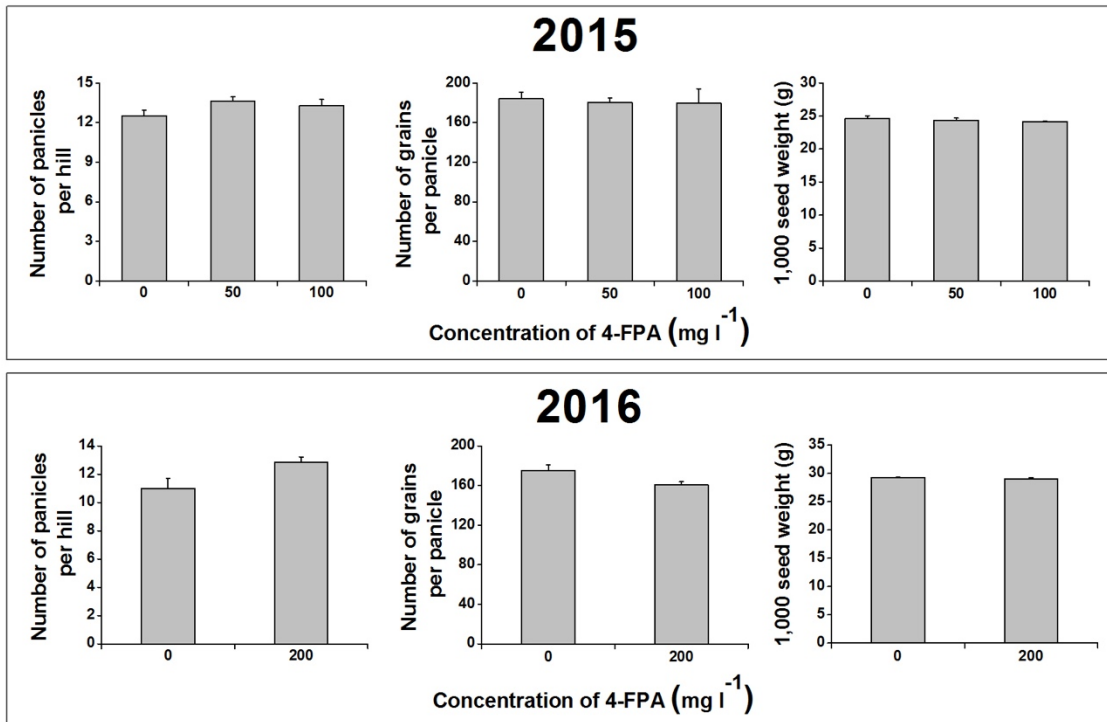

**Fig. S10.** Mean number of panicles per hill, number of grains per panicle and 1,000 seed weight (+SE, n=3) of plants that were sprayed with different concentrations of 4-FPA in 2015 (upper) and 2016 (below). Differences between treatments are not significant.



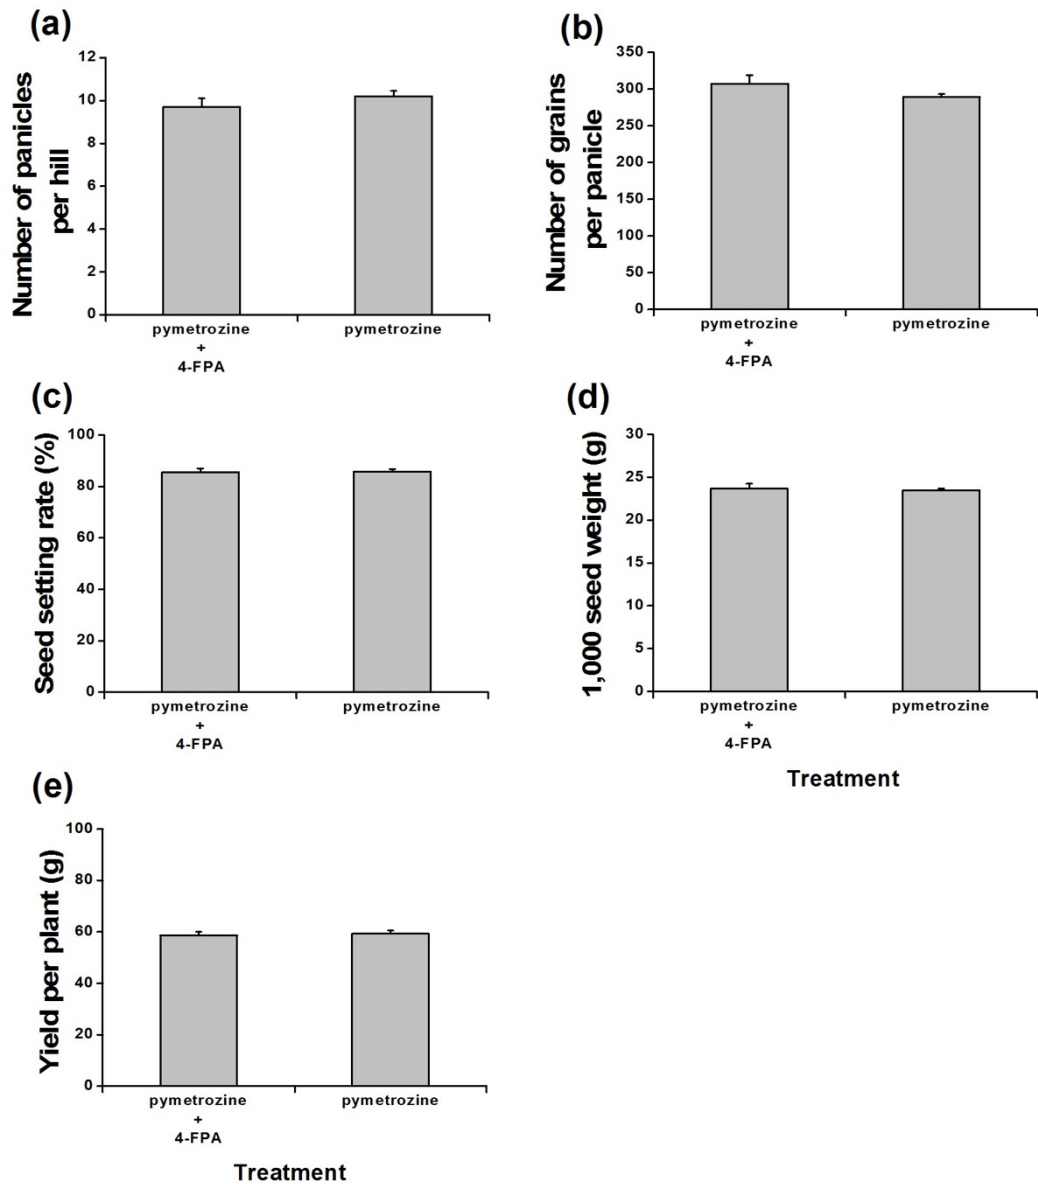

**Fig. S11.** Mean number of panicles per hill, number of grains per panicle, seed setting rate, 1,000 seed weight and yield per plant (+SE, n=4) of plants that were sprayed with pymetrozine plus 4-FPA or pymetrozine alone. Differences between treatments are not significant.

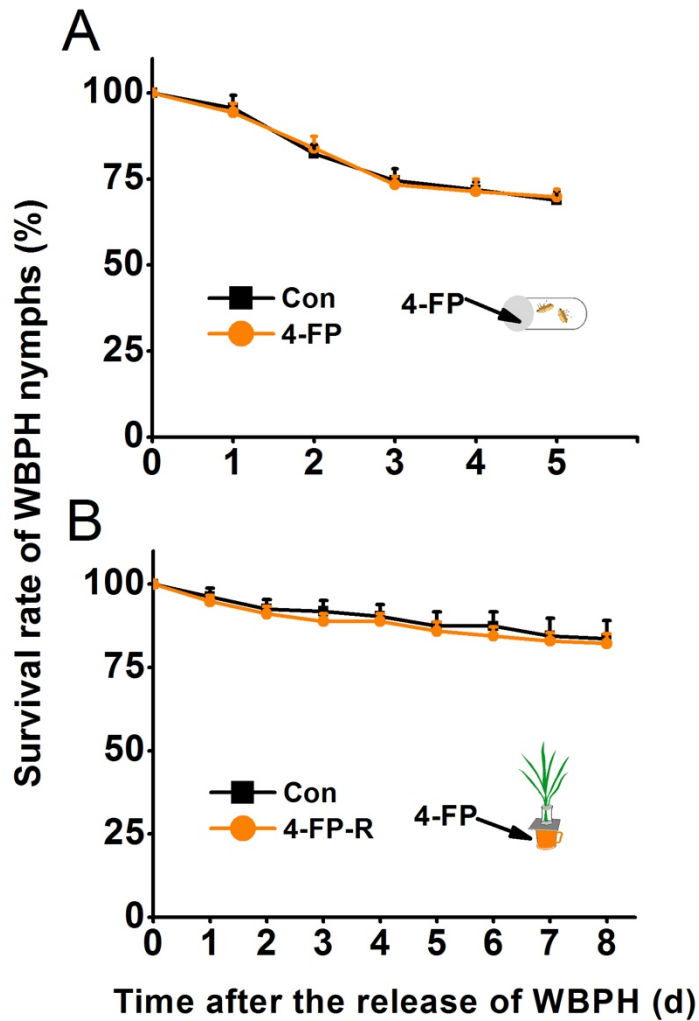

**Fig. S12. 4-FP does not induce rice defences and has no direct harmful effects on WBPH nymphs.**

(A) Mean survival rate (+SE, n=8) of 15 newly hatched WBPH nymphs fed artificial diet containing 50 mg l<sup>-1</sup> 4-FP or not (Con). (B) Mean survival rate (+SE, n=8) of 15 newly hatched WBPH nymphs on plants that had been grown in nutrient solution containing 5 mg l<sup>-1</sup> 4-FP or not (Con) for 12 h, 1-8 d post exposure. Differences between treatments are not significant.

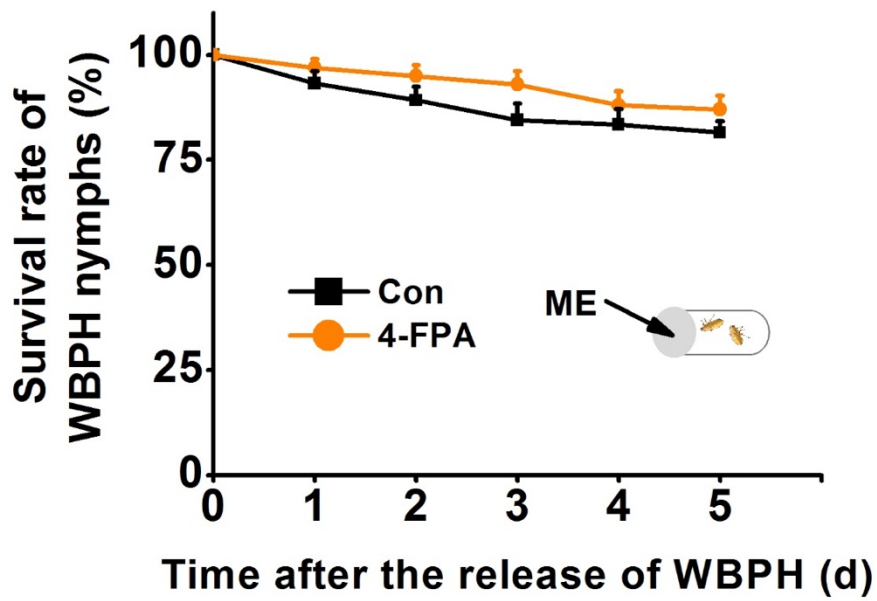

**Fig. S13. Methanol extracts of 4-FPA-treated rice plants did not influence WBPH nymph performance.**

Mean survival rate (+SE, n=8) of 15 newly hatched WBPH nymphs fed artificial diet containing the methanol extract (ME) of plants that had been grown in nutrient solution containing 5 mg L<sup>-1</sup> for 4.5 d or control plants. One ml of artificial diet was added 50 µl of 500 µl g<sup>-1</sup> fresh weight ME. Differences between treatments are not significant.

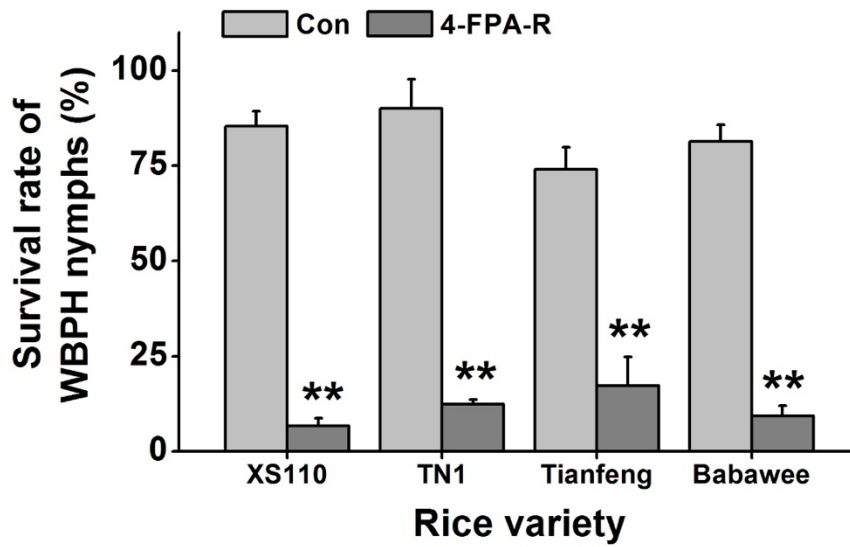

**Fig. S14. Rice variety does not influence the 4-FPA-induced defenses in rice plants against WBPH nymphs.**

Mean survival rate (+SE, n=8) of 15 newly hatched WBPH nymphs on plants of different rice varieties grown in nutrient solution containing 5 mg l<sup>-1</sup> 4-FPA, or control plants for 12 h, 1-8 d post exposure. Asterisks indicate significant differences between treatments and controls (\*\*P < 0.01; Student's t-tests).

**Table S1.** Verification of differently-expressed genes by qRT-PCR

| <b>Gene ID</b> | <b>Fold change<br/>(Transcriptome)</b> | <b>Fold change<br/>(qRT-PCR)</b> |
|----------------|----------------------------------------|----------------------------------|
| LOC_Os02g56120 | 25.23                                  | 24.69                            |
| LOC_Os01g09700 | 60.04                                  | 31.22                            |
| LOC_Os07g44440 | 50.35                                  | 66.38                            |
| LOC_Os01g27210 | 11.23                                  | 11.04                            |
| LOC_Os09g20260 | 30.18                                  | 27.31                            |
| LOC_Os11g06770 | 10.52                                  | 4.19                             |
| LOC_Os05g35290 | 2.78                                   | 2.34                             |
| LOC_Os08g34790 | 4.08                                   | 2.76                             |
| LOC_Os09g34250 | 109.32                                 | 178.41                           |
| LOC_Os01g55940 | 72.23                                  | 61.49                            |
| LOC_Os01g45110 | 117.28                                 | 137.98                           |
| LOC_Os12g02400 | 0.07                                   | 0.12                             |
| LOC_Os01g58100 | 0.18                                   | 0.22                             |
| LOC_Os04g49210 | 0.16                                   | 0.15                             |
| LOC_Os11g02530 | 0.12                                   | 0.23                             |
| LOC_Os05g34030 | 0.07                                   | 0.64                             |

**Table S2.** Differentially-expressed genes related to the auxin-mediated signaling pathway

| <b>Category</b>                | <b>Upregulated</b> | <b>Downregulated</b> | <b>Total</b> |
|--------------------------------|--------------------|----------------------|--------------|
| Auxin transporter-like protein | 4                  | 0                    | 4            |
| Auxin-responsive protein IAA   | 17                 | 1                    | 18           |
| Auxin response factor          | 1                  | 1                    | 2            |
| Jasmonic acid-amido synthetase | 6                  | 0                    | 6            |
| Auxin-responsive SAUR family   | 10                 | 0                    | 10           |
| <b>Total</b>                   | <b>38</b>          | <b>2</b>             | <b>40</b>    |

**Table S3.** Differentially-expressed genes related to hydrogen peroxide generating and scavenging system.

| <b>Category</b>                     | <b>Upregulated</b> | <b>Downregulated</b> | <b>Total</b> |
|-------------------------------------|--------------------|----------------------|--------------|
| <b>Hydrogen peroxide generating</b> |                    |                      |              |
| Polyamine oxidase                   | 2                  | 1                    | 3            |
| Amine oxidase                       | 1                  | 1                    | 2            |
| Xanthine oxidase                    | 1                  | 0                    | 1            |
| Superoxidase dismutase              | 1                  | 3                    | 4            |
| Glycolate oxidase                   | 1                  | 2                    | 3            |
| Glucose oxidase                     | 1                  | 0                    | 1            |
| Glyoxal oxidase                     | 1                  | 0                    | 1            |
| NADH dehydrogenase                  | 9                  | 0                    | 9            |
| Pyranose oxidase                    | 2                  | 0                    | 2            |
| Cytochrome C oxidase subunit        | 2                  | 0                    | 2            |
| Respiratory burst oxidase           | 1                  | 0                    | 1            |
| Protoporphyrinogen oxidase          | 0                  | 1                    | 1            |
| Coproporphyrinogen III oxidase      | 0                  | 1                    | 1            |
| Acyl-CoA oxidase                    | 4                  | 1                    | 5            |
| Sarcosine oxidase                   | 1                  | 0                    | 1            |
| Sulfite oxidase                     | 1                  | 0                    | 1            |
| <b>Total</b>                        | <b>28</b>          | <b>10</b>            | <b>38</b>    |
| <b>Hydrogen peroxide scavenging</b> |                    |                      |              |
| Peroxidase                          | 25                 | 2                    | 27           |
| L-ascorbate peroxidase              | 2                  | 3                    | 5            |
| Glutathione peroxidase              | 2                  | 0                    | 2            |
| Glutathione S-transferase           | 13                 | 3                    | 16           |
| Glutathione reductase               | 2                  | 1                    | 3            |
| Monodehydroascorbate reductase      | 1                  | 1                    | 2            |
| Catalase                            | 1                  | 2                    | 3            |
| <b>Total</b>                        | <b>46</b>          | <b>12</b>            | <b>58</b>    |

**Table S4.** Differentially-expressed genes related to the phenylpropanoid pathway.

| <b>Category</b>                         | <b>Upregulated</b> | <b>Downregulated</b> | <b>Total</b> |
|-----------------------------------------|--------------------|----------------------|--------------|
| Phenylalanine ammonia-lyase             | 3                  | 1                    | 4            |
| Trans-cinnamate 4-monooxygenase         | 2                  | 0                    | 2            |
| 4-coumarate--CoA ligase                 | 4                  | 1                    | 5            |
| Cinnamoyl-CoA reductase                 | 3                  | 0                    | 3            |
| Phenylalanine/tyrosine ammonia-lyase    | 1                  | 0                    | 1            |
| Cinnamyl-alcohol dehydrogenase          | 3                  | 1                    | 4            |
| Peroxidase                              | 25                 | 2                    | 27           |
| Shikimate O-hydroxycinnamoyltransferase | 2                  | 0                    | 2            |
| Coumaroylquinate 3'-monooxygenase       | 1                  | 0                    | 1            |
| Caffeoyl-CoA O-methyltransferase        | 1                  | 0                    | 1            |
| Coniferyl-aldehyde dehydrogenase        | 2                  | 0                    | 2            |
| Chalcone synthase                       | 1                  | 0                    | 1            |
| Chalcone isomerase                      | 1                  | 0                    | 1            |
| Flavonoid 3'-monooxygenase              | 1                  | 1                    | 2            |
| Flavonol synthase                       | 1                  | 0                    | 1            |
| Leucoanthocyanidin reductase            | 1                  | 0                    | 1            |
| Anthocyanidin reductase                 | 0                  | 1                    | 1            |
| <b>Total</b>                            | <b>52</b>          | <b>7</b>             | <b>59</b>    |



**Table S5.** 4-FPA treatment increases the level of free amino acids in plants

| <b>Amino acid</b> | <b>Con</b>            | <b>4-FPA-R</b>        | <b>W-NP</b>          | <b>4-FPA-R + W-NP</b> |
|-------------------|-----------------------|-----------------------|----------------------|-----------------------|
| P-Ser             | 37.90±1.8b            | 107.27±8.7a           | 46.34±1.6b           | 117.36±5.9a           |
| PEA               | 68.38±10.0b           | 86.23±5.5ab           | 91.91±5.0a           | 88.70±3.9ab           |
| Urea              | 157.29±23.4a          | 205.65±43.2a          | 176.22±28.8a         | 205.93±25.1a          |
| Asp               | 178.27±10.9b          | 215.65±6.6a           | 208.60±8.5a          | 217.50±8.3a           |
| Thr               | 50.89±6.2b            | 157.50±16.5a          | 72.50±5.3b           | 169.97±8.8a           |
| Ser               | 184.88±23.9b          | 870.94±73.6a          | 238.44±14.1b         | 919.28±45.7a          |
| Glu               | 421.58±23.2b          | 601.66±35.2a          | 479.78±18.8b         | 610.01±18.5a          |
| Gly               | 8.50±2.3b             | 38.26±3.2a            | 13.73±1.8b           | 43.39±3.9a            |
| Ala               | 104.09±21.7b          | 482.05±80.5a          | 112.37±8.1b          | 498.87±107.8a         |
| Cit               | 7.26±1.6b             | 17.17±2.6a            | 9.31±0.4b            | 20.11±1.7a            |
| a-ABA             | LLD                   | 2.89±1.0a             | LLD                  | 3.80±0.3a             |
| Val               | 23.92±2.6c            | 53.92±4.5b            | 28.41±2.5c           | 63.89±3.4a            |
| Cys               | LLD                   | LLD                   | LLD                  | 10.32±3.3             |
| Met               | LLD                   | LLD                   | LLD                  | 5.17±2.3              |
| Ile               | 5.16±0.9b             | 14.43±1.6a            | 6.52±0.8b            | 17.57±1.1a            |
| Leu               | 7.70±0.9b             | 21.46±2.3a            | 9.78±1.1b            | 24.57±1.5a            |
| Tyr               | 10.04±1.0b            | 28.61±2.6a            | 10.93±0.8b           | 29.56±1.0a            |
| Phe               | 1.61±1.0c             | 16.58±2.3b            | 3.33±1.4c            | 22.74±2.1a            |
| g-ABA             | 8.23±1.8b             | 20.86±2.3a            | 7.42±1.0b            | 20.39±3.3a            |
| NH <sub>3</sub>   | 5.35±0.3d             | 18.47±1.0b            | 8.26±0.3c            | 24.48±0.4a            |
| Lys               | 2.76±0.5c             | 6.38±0.6ab            | 5.77±0.8b            | 7.98±0.7a             |
| His               | LLD                   | 9.49±0.7a             | 6.20±0.5b            | 10.59±1.5a            |
| Arg               | 9.69±3.2b             | 34.24±6.3a            | 33.82±5.7a           | 53.27±9.3a            |
| Pro               | LLD                   | 34.83±4.9a            | 8.88±2.3b            | 41.57±3.4a            |
| <b>Total</b>      | <b>1293.50±101.7b</b> | <b>3044.53±210.6a</b> | <b>1578.53±89.5b</b> | <b>3233.13±176.9a</b> |

Data are mean ± SE; Letters indicate significant differences among treatments ( $P < 0.05$ ; Duncan's multiple-range test). Plants received one of four treatments, 4-FPA, 4-FPA+W-NP, W-NP and control. Treatment details are described Materials and Methods.

**Table S6.** Management measurements for field experiments in 2015, 2016 and 2019

| Item                                                                              | Year                |                     |                     |
|-----------------------------------------------------------------------------------|---------------------|---------------------|---------------------|
|                                                                                   | 2015                | 2016                | 2019                |
| <b>Date of soaking seeds</b>                                                      | 16 May              | 20 May              | 11 May              |
| <b>Date of sowing</b>                                                             | 20 May              | 23 May              | 14 May              |
| <b>Seedling bed period</b>                                                        |                     |                     |                     |
| <b>Fertilizers</b> (kg per hectare/applied date)                                  |                     |                     |                     |
| 45%Compound fertilizer                                                            | 225/20 May          | 225/23 May          | 225/14 May          |
| 45%Compound fertilizer                                                            | 150/29 May          | 150/1 June          | 150/28 May          |
| 45%Compound fertilizer+46%urea                                                    | 150+150/10 June     | 150+150/12 June     | 150+150/2 June      |
| <b>Pesticides</b> (amount/applied date)                                           |                     |                     |                     |
| Rancona D 45g/l ME (ml/kg seeds)(soaking seeds)                                   | 3/16 May            | 3/20 May            | 3/11 May            |
| 4%Benzylsulfuron+36% Prochlorine WP (g/ha.)                                       | 900/24 May          | 900/27 May          | 900/17 May          |
| <b>Transplanting date</b>                                                         | 16 June             | 20 June             | 9 June              |
| <b>Field growth period</b>                                                        |                     |                     |                     |
| <b>Fertilizers</b> (kg per ha./applied date)                                      |                     |                     |                     |
| 46%Urea + 60%KCl                                                                  | 300+112.5/22 June   | 300+112.5/25 June   | 300+112.5/13 June   |
| 45%Compound fertilizer                                                            | 262.5/9 June        | 262.5/10 July       | 262.5/27 June       |
| 45%Compound fertilizer+46%urea                                                    | 150+112.5/23 July   | 150+112.5/24 July   | 150+112.5/24 July   |
| <b>Pesticides</b> (amount/applied date)                                           |                     |                     |                     |
| 3.2% Benzylsulfuron+10.8% Acetochlor WP (g/ha.)                                   | 450/22 June         | 450/25 June         | 450/13 June         |
| 1.8%Abamectin EC (ml/ha.)+ 50% Pymetrozine WG (g/ha.) + 32.5%AzTop 325SC (ml/ha.) | 450+450+450/24 Aug. | 450+450+450/25 Aug. | 450+450+450/23 Aug. |
| 20%Tricyclazole WP (g/ha.)                                                        | 1500/12 Sep.        | 1500/13 Sep.        | 1500/10 Sep.        |
| <b>Applied date of 4-FPA sodium salt AS</b>                                       | 8 July              | 12 July             | 27 June             |
| <b>Date of yield measurement</b>                                                  | 8 Oct.              | 11 Oct.             | 29 Sep.             |

**Note:** the fertilizers and pesticides used in the field are produced by the following companies. 45%Compound fertilizer, containing 15% urea, 15% P<sub>2</sub>O<sub>5</sub> and 15% K<sub>2</sub>O, Liuguo Chemical Industry, Tongling, Anhui, China; 46% urea, Anhui Sierte Fertilizer Industry Co., Ltd., Xuancheng, Anhui, China; 60% KCl, Sinofert Holding Limited, Beijing, China; Rancona D 45g/l ME, Arysta Lifescience (Shanghai) Co., Ltd., Shanghai, China; 4%Benzylsulfuron+36% Prochlorine WP, Zhejiang Tianyi Agrochemical Co., Ltd., Shaoxing, Zhejiang, China; 3.2% Benzylsulfuron+10.8% Acetochlor WP, Jiangsu kuaida Agrochemical Co., Ltd., Rudong, Jiangsu, China; 1.8%Abamectin EC, Hebei Weiyuan Biochemical Co., Ltd., Shijiazhuang, Hebei, China; 50% Pymetrozine WG, Syngenta, Basel, Switzerland; 32.5%AzTop 325SC, containing 20% Azoxystrobin and 15% Defenoconazole, Syngenta, Basel, Switzerland; 20%Tricyclazole WP, Wenzhou Pesticide Factory, Wenzhou, Zhejiang, China.

**Table S7.** Selected genes and their primers used for qRT-PCR

| Gene ID        | Definition                                      |   |                        |
|----------------|-------------------------------------------------|---|------------------------|
| LOC_Os02g56120 | Auxin-responsive protein IAA                    | F | GCGCCTAACTACGTGAAGGT   |
|                |                                                 | R | GCAGCGAGCTCGTCGTAGG    |
| LOC_Os01g09700 | 1-aminocyclopropane-1-carboxylate synthase      | F | CTCGAGGCCTACCTCCGTGA   |
|                |                                                 | R | AACAGCGCGTTGTCCCTGAA   |
| LOC_Os07g44440 | Peroxidase                                      | F | ACGTCGAGTCGCACAAGGAC   |
|                |                                                 | R | CTCGTCGGCGTCGATCATGT   |
| LOC_Os01g27210 | Glutathione S-transferase                       | F | GCGGACCTCAGCCACTTCTC   |
|                |                                                 | R | GCCATCACCTTCTGCACCGT   |
| LOC_Os09g20260 | Polyamine oxidase                               | F | AGCCTGCAGAACACCGTTCC   |
|                |                                                 | R | GGACTTGTCCGCGTTGAGGT   |
| LOC_Os11g06770 | Ethylene-responsive transcription factor ERF110 | F | GCGGCGAGGAAGAAGAGGAG   |
|                |                                                 | R | CGCGGACACCATCACAGACA   |
| LOC_Os05g35290 | Phenylalanine ammonia-lyase                     | F | CCTCGTCCCCTCTCCTACA    |
|                |                                                 | R | TGGGCTGCAGCTCGAAGAAG   |
| LOC_Os08g34790 | 4-coumarate--CoA ligase                         | F | GCAGGGCCGGTGCTATCAAT   |
|                |                                                 | R | ATCTTCAGCTCGGCGTTCCG   |
| LOC_Os09g34250 | UDP-glucosyl transferase                        | F | CGAGCTCCAGCCACAGGAAG   |
|                |                                                 | R | GTCGTCGGCGAGAAGAGGTG   |
| LOC_Os01g55940 | Jasmonic acid-amido synthetase                  | F | CCGAGTGCGGGAAGGACAAG   |
|                |                                                 | R | GGAGCCCACCGCTGTAGAAC   |
| LOC_Os01g45110 | Anthocyanin 3'-O-beta-glucosyltransferase       | F | GGTCGCTCTTGCGAACAAGG   |
|                |                                                 | R | GCCGAAGGAGACGTACACCA   |
| LOC_Os12g02400 | WRKY114                                         | F | GCCCTCTCCGTCATGAACCA   |
|                |                                                 | R | TTCCAGCGACGTGGTTGTCT   |
| LOC_Os01g58100 | Polyphenol oxidase                              | F | AACGAGCGATGTCGTGTTGC   |
|                |                                                 | R | GTCAGAGTTTGGGCGCATGG   |
| LOC_Os04g49210 | Naringenin,2-oxoglutarate 3-dioxygenase         | F | CGACTTCTGCGCTTGCATT    |
|                |                                                 | R | CGAGTAGGTGCCGACCACTT   |
| LOC_Os11g02530 | WRKY40                                          | F | AGGCAACAAAGACGGTGCAG   |
|                |                                                 | R | AGCAGGTATGCTGGCCGTAG   |
| LOC_Os05g34030 | Peptide transporter PTR2                        | F | CGACGATCGGGTTCAATGCC   |
|                |                                                 | R | CCGACGATCGGTGTGAGGTT   |
| LOC_Os03g50885 | Actin                                           | F | TGGACAGGTTATCACCATTGGT |
|                |                                                 | R | CCGCAGCTTCCATTCCCTATG  |

**Table S8.** The composition of reagents or chemicals in different reaction systems

| No. | POD ( $\mu\text{L}$ )<br>(0.34mg/mL) | H <sub>2</sub> O <sub>2</sub> ( $\mu\text{L}$ )<br>(0.3%) | 4-FP ( $\mu\text{L}$ )<br>(10mg/mL) | Naringenin ( $\mu\text{L}$ )<br>(50 mg/L) | Quercitrin ( $\mu\text{L}$ )<br>(50 mg/L) | PBS ( $\mu\text{L}$ )<br>(0.05 mM) | Total volume |
|-----|--------------------------------------|-----------------------------------------------------------|-------------------------------------|-------------------------------------------|-------------------------------------------|------------------------------------|--------------|
| 1   | —                                    | —                                                         | 100                                 | 100                                       | —                                         | 210                                | 410          |
| 2   | 10                                   | —                                                         | 100                                 | 100                                       | —                                         | 200                                | 410          |
| 3   | —                                    | 200                                                       | 100                                 | 100                                       | —                                         | 10                                 | 410          |
| 4   | 10                                   | 200                                                       | 100                                 | —                                         | —                                         | 100                                | 410          |
| 5   | 10                                   | 200                                                       | 100                                 | 100                                       | —                                         | —                                  | 410          |
| 6   | 10                                   | 200                                                       | 100                                 | —                                         | 100                                       | —                                  | 410          |
| 7   | 10                                   | 200                                                       | —                                   | 100                                       | —                                         | 100                                | 410          |
| 8   | 10                                   | 200                                                       | —                                   | —                                         | 100                                       | 100                                | 410          |
